# Supplementary material for: Life History Trade-Offs and Relaxed Selection Can Decrease Bacterial Virulence in Environmental Reservoirs
Source: PubMed Central journal article supplement (PMC3427151; doi:10.1371/journal.pone.0043801), 2012-08-24
Supplement: pone.0043801.s001.pdf [file pone.0043801.s001.pdf]

| <b>Treatment:</b> | Predator absent |        | Predator present |        | Ancestor |        | Water    |        |
|-------------------|-----------------|--------|------------------|--------|----------|--------|----------|--------|
|                   | $\chi^2$        | p=     | $\chi^2$         | p=     | $\chi^2$ | p=     | $\chi^2$ | p=     |
| Predator absent   |                 |        | 10.7             | 0.001  | 120.0    | <0.001 | 41.0     | <0.001 |
| Predator present  | 10.7            | 0.001  |                  |        | 175.1    | <0.001 | 27.0     | <0.001 |
| Ancestor          | 120.0           | <0.001 | 175.1            | <0.001 |          |        | 81.2     | <0.001 |
| Water             | 41.0            | <0.001 | 27.0             | <0.001 | 81.2     | <0.001 |          |        |
