# Supplementary material for: Life History Trade-Offs and Relaxed Selection Can Decrease Bacterial Virulence in Environmental Reservoirs
Source: PubMed Central journal article supplement (PMC3427151; doi:10.1371/journal.pone.0043801), 2012-08-24
Supplement: pone.0043801.s002.pdf [file pone.0043801.s002.pdf]

| <b>Predation &amp; Prodigiosin:</b> | <b>Predator absent, White</b> |       | <b>Predator present, White</b> |        | <b>Predator absent, Red</b> |        | <b>Predator present, Red</b> |        |
|-------------------------------------|-------------------------------|-------|--------------------------------|--------|-----------------------------|--------|------------------------------|--------|
|                                     | $\chi^2$                      | p=    | $\chi^2$                       | p=     | $\chi^2$                    | p=     | $\chi^2$                     | p=     |
| Predator absent, White              |                               |       | 6.8                            | 0.009  | 7.0                         | 0.008  | 9.8                          | 0.002  |
| Predator present, White             | 6.8                           | 0.009 |                                |        | 37.5                        | <0.001 | 38.2                         | <0.001 |
| Predator absent, Red                | 7.0                           | 0.008 | 37.5                           | <0.001 |                             |        | 0.8                          | 0.367  |
| Predator present, Red               | 9.8                           | 0.002 | 38.2                           | <0.001 | 0.8                         | 0.367  |                              |        |
